# Supplementary material for: Enhanced oxygen evolution and urea oxidation reaction using a nanosheet-structured NiO@P-doped carbon composite as an anode catalyst
Source: Royal Society of Chemistry journal article supplement (doi:10.1039/d4nj03115f), 2024-01-01
Supplement: d4nj03115f1.pdf [file d4nj03115f1.pdf]

## Supporting Information

### Enhanced oxygen evolution and urea oxidation reaction using nanosheet-structured

#### NiO@P-doped carbon composite as anode catalyst

S Tamilarasi<sup>a</sup>, Ramasamy Santhosh Kumar<sup>a</sup>, Dr. Thiruvenkadam Srinivasan<sup>b</sup>, Dong Jin Yoo<sup>a,c\*</sup>

<sup>a</sup>Department of Energy Storage/Conversion Engineering of Graduate School (BK21 FOUR),  
Hydrogen and Fuel Cell Research Center, Jeonbuk National University, Jeonju, Jeollabuk-do  
54896, Republic of Korea

<sup>b</sup>School of electrical engineering, Vellore institute of technology, Vellore, Tamilnadu, India.

<sup>c</sup>Department of Life Science, Jeonbuk National University, Jeonju, Jeollabuk-do 54896,  
Republic of Korea

\*Corresponding Email ID: [djyoo@jbnu.ac.kr](mailto:djyoo@jbnu.ac.kr)

Fax: +82-(0) 63-270-3909 Tel: +82-(0) 63-270- 3608

**2.4. Materials characterization.** While high-resolution transmission electron microscopy (HR-TEM) (JEM-ARM200F, JEOL), energy dispersive X-ray spectroscopy, and atomic force microscopy (AFM) (Innova, Bruker, USA) are at the center of future energy accumulation, all electrocatalysts created were morphologically characterized using these techniques. The generated electrocatalysts X-ray diffraction (XRD) patterns were assessed to use a PANalytical (X'PERT-PRO Powder) (model) and Cu K light (= 0.154 nm). We measured the Raman spectrum of each manufactured electrocatalyst using elevated 3D mapping Scanning Raman spectroscopy with a NANO PHOTON (RAMAN Touch) outfitted with such a 532 nm helium-neon laser at the Jeonbuk National University (JBNU) Center for University-wide Research Facilities (CURF) in South Korea. The chemical state of the materials as-obtained was examined to use an X-ray photoelectron spectroscopy (XPS; Axis-Nova, Kratos Inc.) and a Brunauer-Emmett-Teller (BET) Autosorb-iQ 2ST/MP physisorption analyzer was used to look at the prepared catalysts surface area, at the Korea Basic Science Institute of Jeonju Center (KBSI), South Korea. Using the Ni K-edges, measurements of the extended X-ray absorption fine structure (EXAFS) and the X-ray absorption near edge structure (XANES) based on the R-XAS model (Rigaku, Japan) were carried out using the Sc-detector of Chonnam National University with total electron yield detection.

**2.5. Electrochemical analysis.** The HER electrochemical performances were investigated using a three-electrode cell with carbon paper-supported electrocatalyst as a working electrode. Graphite rods were employed as the counter electrode while Ag/AgCl was used as the reference electrode. It took about 60 cycles to initially activate the working electrode in a 1.0 M KOH solution until the curve became crisp. The HER polarization curves were measured using linear sweep voltammetry (LSV) in 1.0 M KOH at fixed scanning and sweep rates of 1 mV s<sup>-1</sup>. The following

equation was used to express all recorded potentials based on the reversible hydrogen electrode (RHE).

$$E_{\text{RHE}} = E_{\text{AgCl}} + (0.197 + 0.059 \times \text{pH})$$

Electrochemical impedance spectroscopy (EIS) was carried out within a frequency range of 100 kHz - 0.1 Hz with an amplitude of 5 mV in 1.0 M KOH. The long-term durability test was performed using chronopotentiometry measurements.

### **Capacitance measurements and comparison of ECSA**

Cyclic voltammetry was carried out to probe the electrochemical double layer capacitance ( $C_{\text{dl}}$ ) of various samples at non-Faradaic potentials between 0.05 and 0.25 V (vs. RHE in 0.5 M  $\text{H}_2\text{SO}_4$ ) with sweep rates of 10, 20, 30, 40, and 50  $\text{mV s}^{-1}$ . The double-layer capacitance ( $C_{\text{dl}}$ ) values of the samples were estimated by plotting  $\Delta J = J_{\text{a}} - J_{\text{c}}$  against the CV scan rate, where the slope was twice  $C_{\text{dl}}$ . The ECSA of each electrocatalyst was then calculated by

$$\text{ECSA} = C_{\text{dl}}/C_{\text{s}},$$

Here,  $C_{\text{s}}$  is specific capacitance of the alkaline electrolyte ( $C_{\text{s}} = 0.04 \text{ mF cm}^2$ ). The roughness factor (RF) was calculated by

$$\text{RF} = \text{ECSA}/\text{GSA}$$

where GSA is the geometric surface area of the sample.

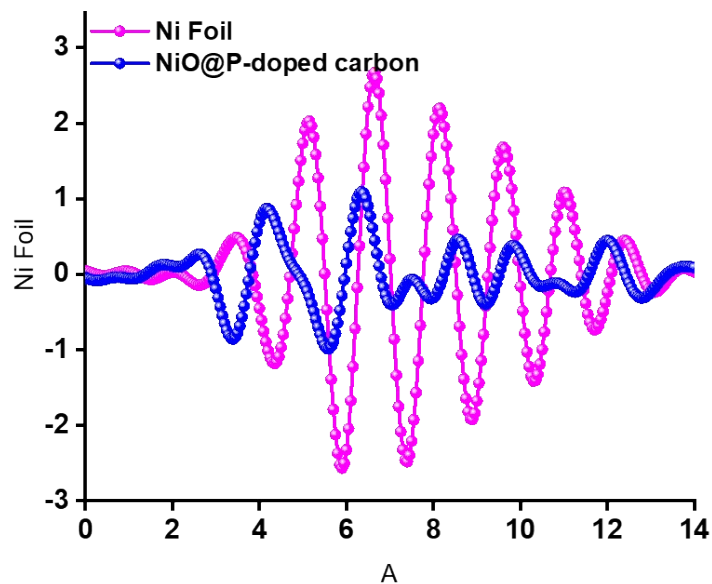

**Fig. S1** EXAFS Ni k-edge spectrum of NiO/P-doped carbon composite.

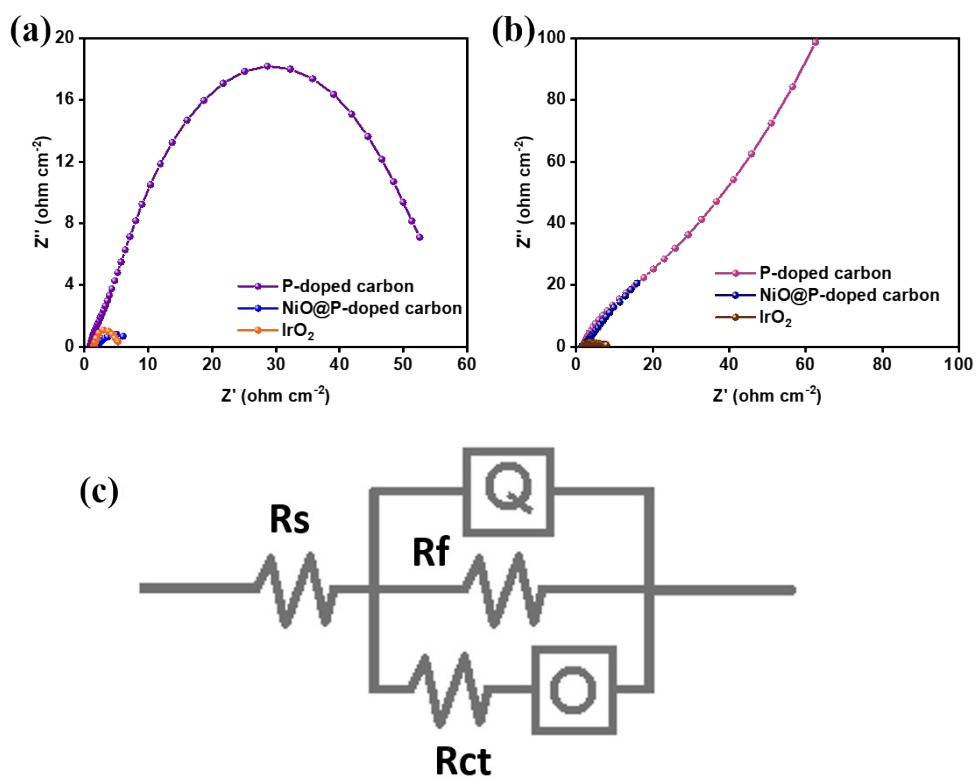

**Fig. S2.** EIS spectra of NiO@P-doped carbon, P-doped carbon, and IrO<sub>2</sub> electrocatalysts, (a) 1 M KOH solution, (b) 1 M KOH + 0.5 M urea solution, and (c) EIS fitting circuit.

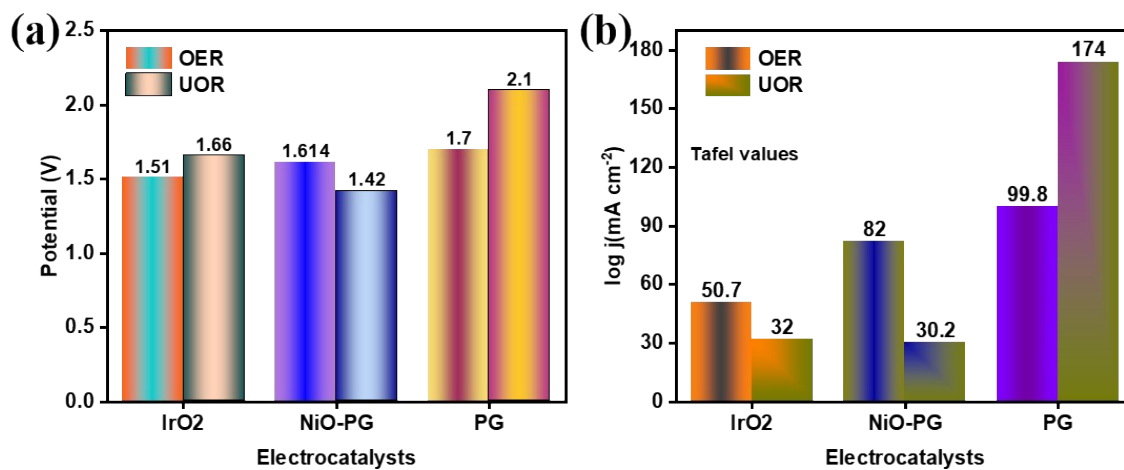

**Fig. S3.** (a, b) Comparison of overpotential values and Tafel values

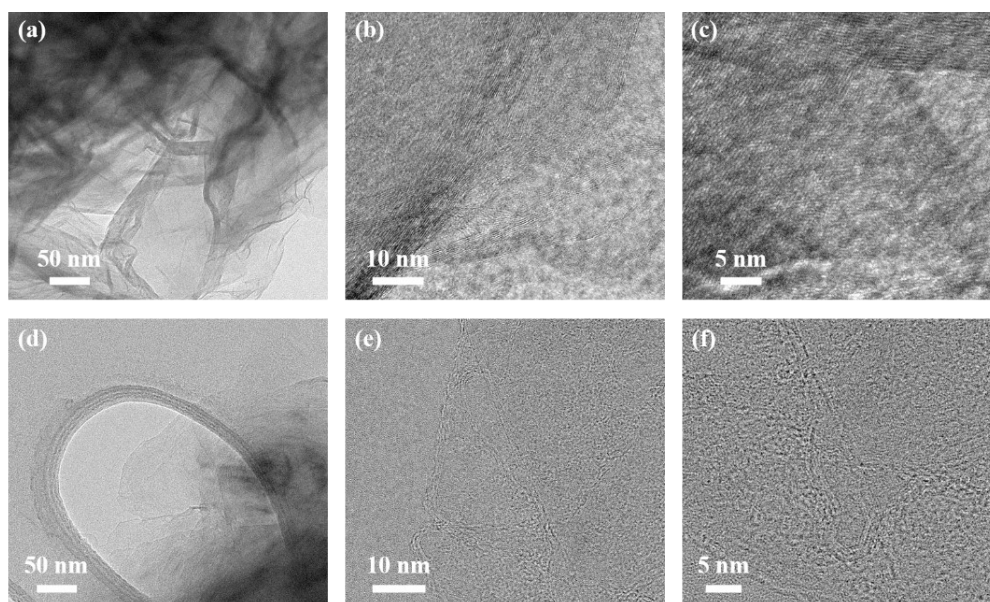

**Fig. S4** TEM analysis of (a-c) before stability and (d-f) after HER stability in acid medium of NiO/P-doped carbon electrocatalyst.

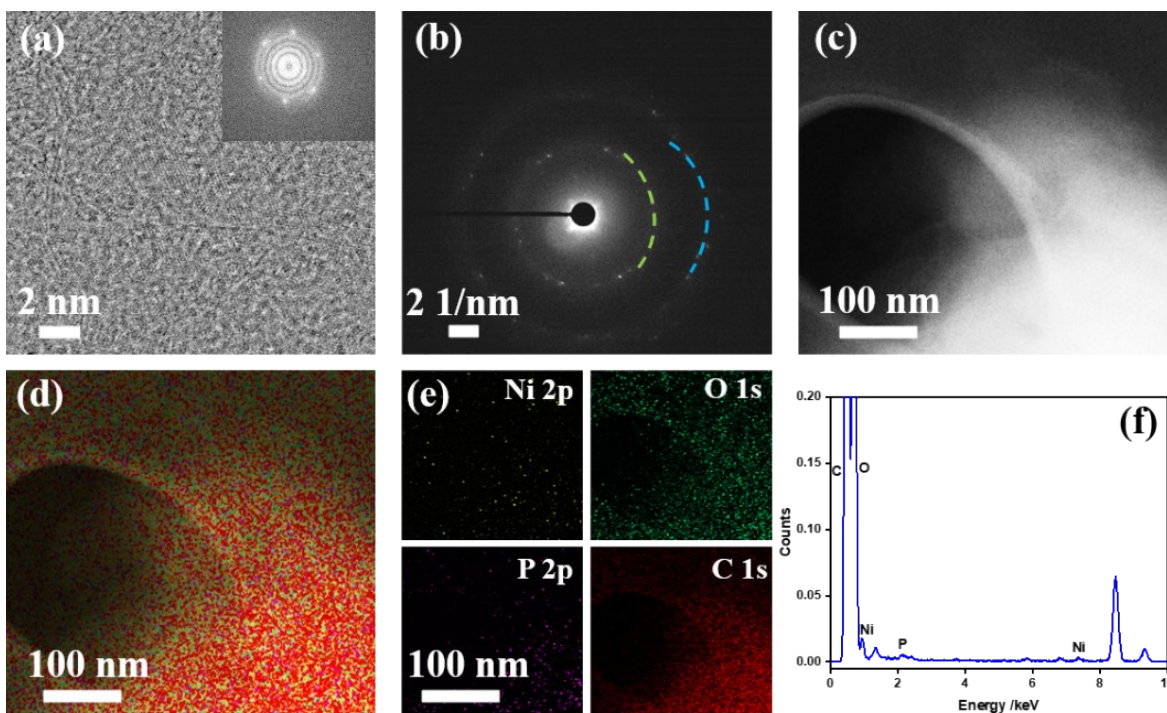

**Fig. S5** (a) HR-TEM, (b) SAED pattern, (c) HAADF image, (d) mapping overlap image, (e) color mapping corresponding elemental, and (f) EDS elemental spectrum of NiO/P-doped carbon electrocatalyst evaluating post-HER cyclic stability at 500 mA cm<sup>-2</sup> current density corresponding to Ni, O, P, and C.

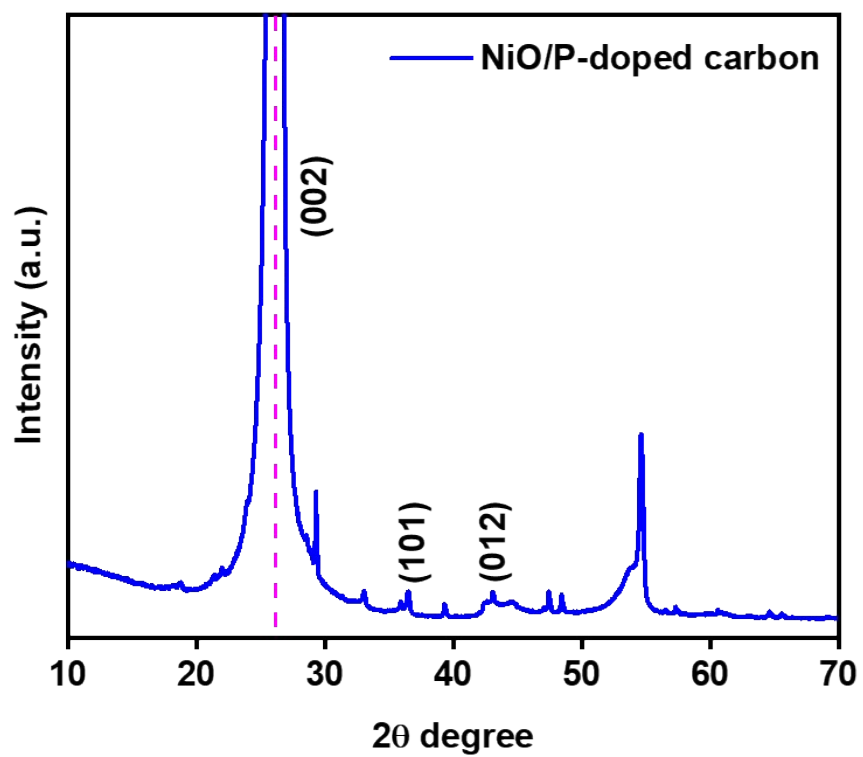

**Fig. S6** after long-term stability test XRD analysis of NiO/P-doped carbon

**Table S1.** Comparison of metal electrocatalysts for OER and UOR performance.

| <b>Catalysts</b>                                 | <b>OER<br/>@10mA</b> | <b>UOR<br/>@10mA</b> | <b>Published<br/>year</b> | <b>Ref</b>              |
|--------------------------------------------------|----------------------|----------------------|---------------------------|-------------------------|
| NiCoP/NF                                         | 203                  | 1.13                 | 2023                      | [1]                     |
| 2D/2D Ru-Co DAS/NiO                              | --                   | 1.288                | 2023                      | [2]                     |
| Ru-Ni <sub>3</sub> N@NC                          | 270                  | 1.30                 | 2022                      | [3]                     |
| Co-Ni-S@NF                                       | --                   | 1.31                 | 2022                      | [4]                     |
| NiCo LDH                                         | 1.545                | 1.332                | 2024                      | [5]                     |
| Ni-MoN NAM                                       | 1.52                 | 1.28                 | 2023                      | [6]                     |
| Ce-Ni <sub>3</sub> N@CC                          | 279                  | 1.31                 | 2022                      | [7]                     |
| Ni@NiOCN-4                                       | 0.33                 | 1.0                  | 2023                      | [8]                     |
| NiO-CrO@N-C                                      | -                    | 1.37                 | 2024                      | [9]                     |
| Ni/NiO-3                                         | 1.60                 | 1.42                 | 2022                      | [10]                    |
| Ni-NiO-Mo <sub>0.84</sub> Ni <sub>0.16</sub> /NF | -                    | 1.33 (50 mA)         | 2020                      | [11]                    |
| Ni/MNO-10                                        | 280                  | 1.37                 | 2023                      | [12]                    |
| <b>NiO@P-doped carbon</b>                        | <b>1.62</b>          | <b>1.42</b>          | <b>2024</b>               | <b>Present<br/>work</b> |



## References

- [1] L. Yang, F. Ru, J. Shi, T. Yang, C. Guo, Y. Chen, E. Wang, Z. Du, K.-C. Chou, X. Hou, Trifunctional electrocatalysts based on feather-like NiCoP 3D architecture for hydrogen evolution, oxygen evolution, and urea oxidation reactions, *Ceramics International*, 49 (2023) 659-668.
- [2] X. Zheng, J. Yang, P. Li, Z. Jiang, P. Zhu, Q. Wang, J. Wu, E. Zhang, W. Sun, S. Dou, D. Wang, Y. Li, Dual-Atom Support Boosts Nickel-Catalyzed Urea Electrooxidation, *Angewandte Chemie International Edition*, 62 (2023) e202217449.
- [3] Y. Liu, D. Zheng, Y. Zhao, P. Shen, Y. Du, W. Xiao, Y. Du, Y. Fu, Z. Wu, L. Wang, Ru-doped 3D porous Ni<sub>3</sub>N sphere as efficient Bi-functional electrocatalysts toward urea assisted water-splitting, *International Journal of Hydrogen Energy*, 47 (2022) 25081-25089.
- [4] Z. Xu, Q. Chen, Q. Chen, P. Wang, J. Wang, C. Guo, X. Qiu, X. Han, J. Hao, Interface enables faster surface reconstruction in a heterostructured Co–Ni–S electrocatalyst towards efficient urea oxidation, *Journal of Materials Chemistry A*, 10 (2022) 24137-24146.
- [5] Z. Zheng, D. Wu, L. Chen, S. Chen, H. Wan, G. Chen, N. Zhang, X. Liu, R. Ma, Collaborative optimization of thermodynamic and kinetic for Ni-based hydroxides in electrocatalytic urea oxidation reaction, *Applied Catalysis B: Environmental*, 340 (2024) 123214.
- [6] H. Shen, T. Wei, Q. Liu, S. Zhang, J. Luo, X. Liu, Heterogeneous Ni-MoN nanosheet-assembled microspheres for urea-assisted hydrogen production, *Journal of Colloid and Interface Science*, 634 (2023) 730-736.
- [7] M. Li, X. Wu, K. Liu, Y. Zhang, X. Jiang, D. Sun, Y. Tang, K. Huang, G. Fu, Nitrogen vacancies enriched Ce-doped Ni<sub>3</sub>N hierarchical nanosheets triggering highly-efficient urea oxidation reaction in urea-assisted energy-saving electrolysis, *Journal of Energy Chemistry*, 69 (2022) 506-515.
- [8] D.M. Sanke, A.V. Munde, J. Bezboruah, P.T. Bhattad, B.R. Sathe, S.S. Zade, Highly Dispersed Core–Shell Ni@NiO Nanoparticles Embedded on Carbon–Nitrogen Nanotubes as Efficient Electrocatalysts for Enhancing Urea Oxidation Reaction, *Energy & Fuels*, 37 (2023) 4616-4623.
- [9] N. Wu, X. Chi, Y. Zhang, T. Hu, Convenient synthesis and enhanced urea oxidation of NiO–CrO@N–C, *New Journal of Chemistry*, 48 (2024) 5621-5626.
- [10] T.V.M. Sreekanth, G.R. Dillip, X. Wei, K. Yoo, J. Kim, Binder free Ni/NiO electrocatalysts for urea oxidation reaction, *Materials Letters*, 327 (2022) 133038.

- [11] Q. Xu, G. Qian, S. Yin, C. Yu, W. Chen, T. Yu, L. Luo, Y. Xia, P. Tsiakaras, Design and Synthesis of Highly Performing Bifunctional Ni-NiO-MoNi Hybrid Catalysts for Enhanced Urea Oxidation and Hydrogen Evolution Reactions, *ACS Sustainable Chemistry & Engineering*, 8 (2020) 7174-7181.
- [12] V. Maheskumar, A. Min, C.J. Moon, R.A. Senthil, M.Y. Choi, Modulating the Electronic Structure of Ni/NiO Nanocomposite with High-Valence Mo Doping for Energy-Saving Hydrogen Production via Boosting Urea Oxidation Kinetics, *Small Structures*, 4 (2023) 2300212.
